# Supplementary material for: Luminescent properties of Eu-doped magnetic Na3FeF6
Source: Royal Society of Chemistry journal article supplement (doi:10.1039/c8ra07137c), 2018-01-01
Supplement: c8ra07137c1.pdf [file c8ra07137c1.pdf]

## Supplement information

### Luminescence Properties of Eu<sup>3+</sup> Doped Na<sub>3</sub>FeF<sub>6</sub>

Hong Jia,<sup>a</sup> Yiping Zhou,<sup>a</sup> Xiaoyan Wang,<sup>a</sup> Weiying Zhang,<sup>a</sup> Ning Zhang,<sup>a</sup> Xun Feng,<sup>a</sup>  
Zhiang Li,<sup>a</sup> Jianguo Zhao,<sup>\*a</sup> Zhongli Liu,<sup>\*a</sup> Xiaofeng Liu<sup>b</sup>

<sup>a</sup>College of Physics and Electronic Information & Key Laboratory of Electromagnetic Transformation and Detection of Henan province, Luoyang Normal University, Luoyang 471934, China.

<sup>b</sup>School of Materials Science and Engineering, Zhejiang University, Hangzhou 310027, China

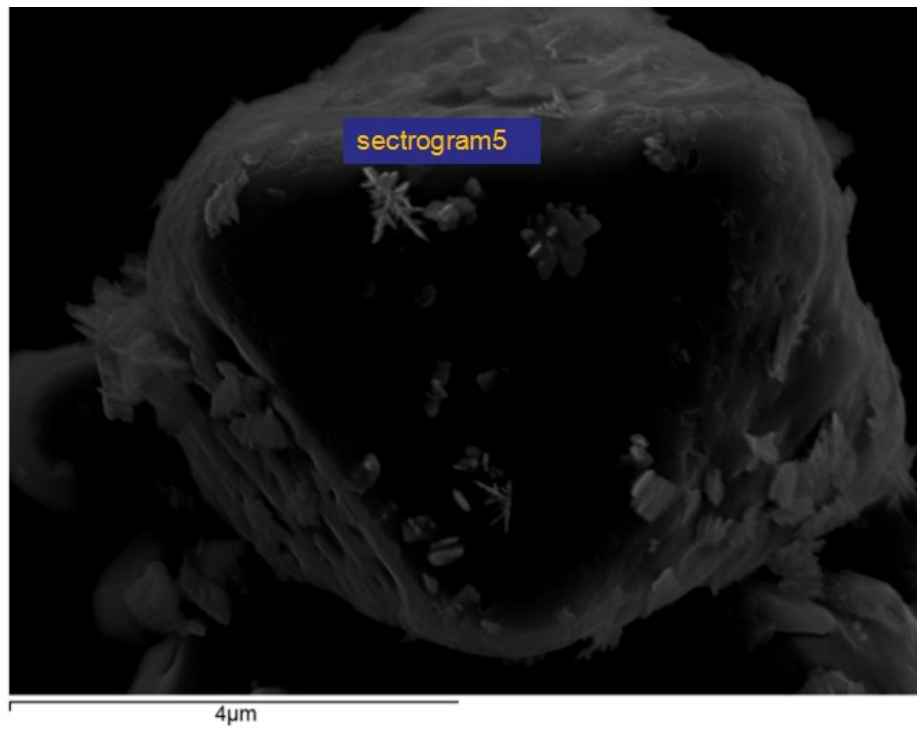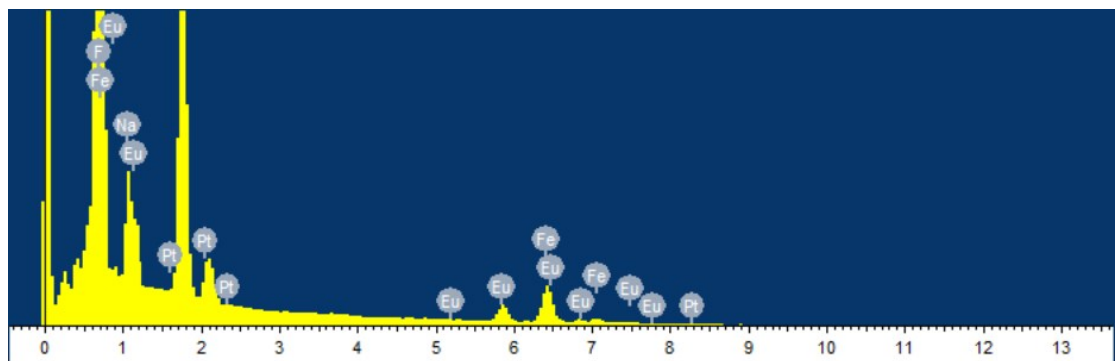

Fig S1. SEM image and the corresponding energy-dispersive spectrum EDS of the Na<sub>3</sub>FeF<sub>6</sub>: 5%Eu powder.

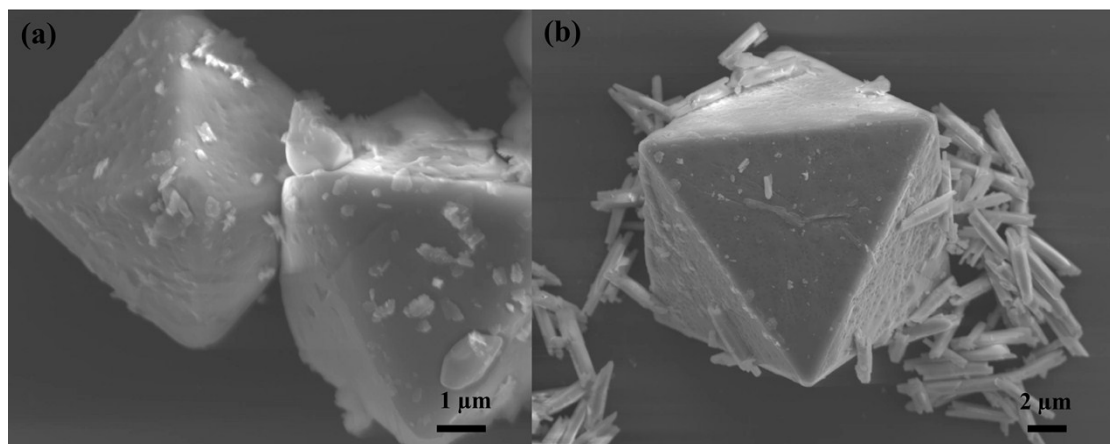

Fig S2. SEM image: (a) Na<sub>3</sub>FeF<sub>6</sub> powder and (b) Na<sub>3</sub>FeF<sub>6</sub>: 15%Eu powder.

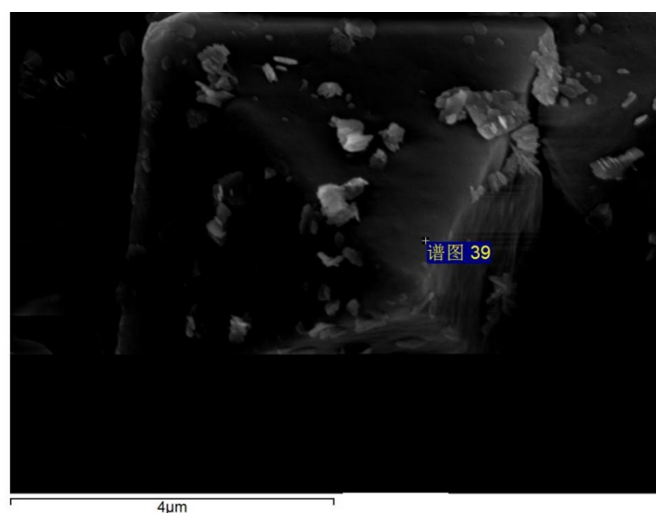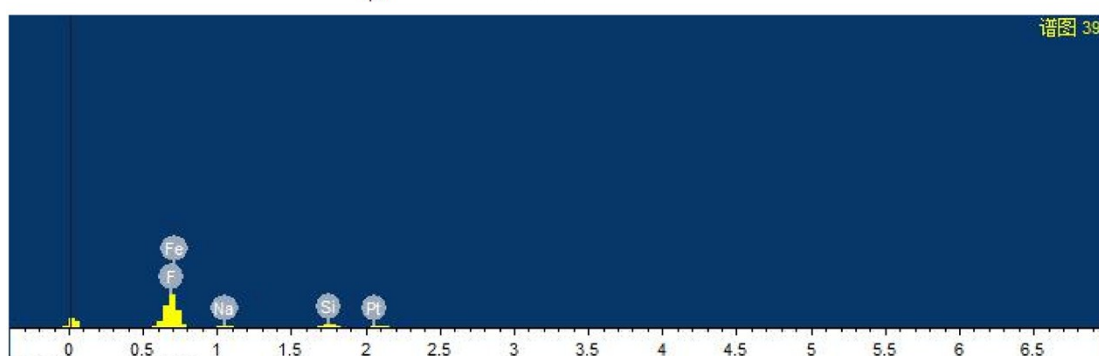

Fig S3. SEM image and the corresponding energy-dispersive spectrum EDS of the Na<sub>3</sub>FeF<sub>6</sub> powder.

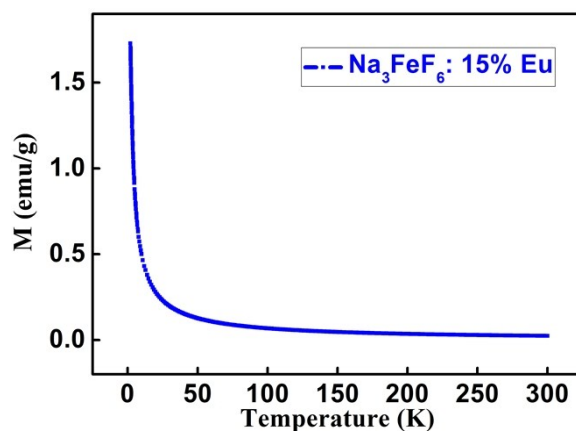

Fig S4. The magnetization curve of Na<sub>3</sub>FeF<sub>6</sub>: 15% Eu<sup>3+</sup> particles at different temperature.

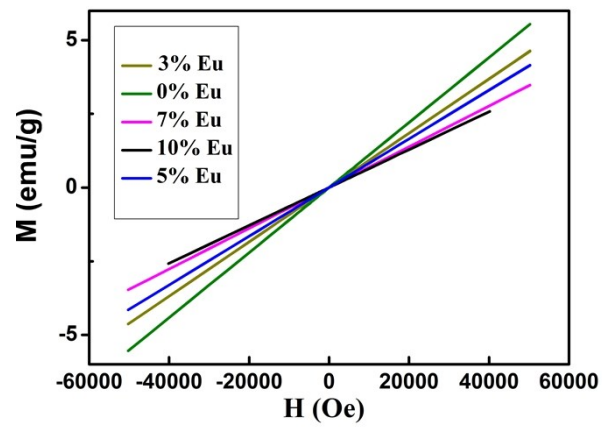

Fig S5 The Magnetization curves of Na<sub>3</sub>FeF<sub>6</sub> doped with different concentration of Eu<sup>3+</sup> ions at 300 K.
